# Supplementary material
Source: HighWire-hosted journal article supplement (https://openres.ersjournals.com/content/9/2/00499-2022)
Supplement: inline-supplementary-material-1 [file inline-supplementary-material-1.pdf]

## Supplemental materials

|                                                                                                                                          |           |
|------------------------------------------------------------------------------------------------------------------------------------------|-----------|
| <b>e-Table 1. Single-nucleotide polymorphisms used to build the genetic risk score for asthma.....</b>                                   | <b>2</b>  |
| <b>e-Table 2. Baseline characteristics per health lifestyle category and genetic risk group of adult-onset asthma .....</b>              | <b>11</b> |
| <b>e-Table 3. Risk of incident adult-onset asthma associated with genetic risk and health lifestyle by sex. ....</b>                     | <b>13</b> |
| <b>e-Table 4. Risk of incident adult-onset asthma associated with genetic risk and health lifestyle in different age categories.....</b> | <b>15</b> |
| <b>e-Table 5. Total participants and incident adult-onset asthma cases in each genetic and health lifestyle category.....</b>            | <b>16</b> |
| <b>e-Table 6. Risk of incident adult-onset asthma according to lifestyle factor based on different genetic risk group.....</b>           | <b>18</b> |
| <b>e-Table 7. Risk of incident adult-onset asthma according to genetic risk based on different health lifestyle.....</b>                 | <b>19</b> |
| <b>e-Table 8. Population-attributable fraction per group.....</b>                                                                        | <b>20</b> |
| <b>e-Table 9. Population-attributable fraction of different kinds of lifestyle in different genetic risk level. ....</b>                 | <b>21</b> |
| <b>e-Table 10. Sensitivity Analysis. ....</b>                                                                                            | <b>22</b> |
| <b>e-Figure 1. Flow diagram of eligible population from the UK Biobank Study.....</b>                                                    | <b>22</b> |
| <b>e-Figure 2. Risk of Incident asthma associated with Genetic Risk and Health Lifestyle Categorized by Sex.....</b>                     | <b>24</b> |
| <b>e-Figure 3. Risk of Incident asthma associated with Genetic Risk and Health Lifestyle Categorized by Age. ....</b>                    | <b>25</b> |

**e-Table 1. Single-nucleotide polymorphisms used to build the genetic risk score for asthma.**

|    |            |            |             |           | <b>Yi Han et al, 2020, PMID 32296059</b> |           |          |
|----|------------|------------|-------------|-----------|------------------------------------------|-----------|----------|
|    | <b>SNP</b> | <b>CHR</b> | <b>BP</b>   | <b>EA</b> | <b>Beta</b>                              | <b>SE</b> | <b>P</b> |
| 1  | rs734999   | 1p36.32    | 2,513,216   | C         | 0.04                                     | 0.0060    | 4.0E-11  |
| 2  | rs301819   | 1p36.23    | 8,501,786   | G         | 0.05                                     | 0.0061    | 1.2E-13  |
| 3  | rs6687430  | 1p36.22    | 10,633,245  | A         | 0.04                                     | 0.0060    | 7.2E-11  |
| 4  | rs2230624  | 1p36.22    | 12,175,658  | G         | 0.18                                     | 0.0253    | 4.3E-12  |
| 5  | rs1293202  | 1p36.11    | 25,263,997  | G         | 0.06                                     | 0.0092    | 1.6E-11  |
| 6  | rs11577318 | 1p36.11    | 26,601,570  | G         | 0.03                                     | 0.0077    | 4.8E-05  |
| 7  | rs2228552  | 1p35.2     | 32,165,495  | T         | 0.03                                     | 0.0062    | 3.4E-08  |
| 8  | rs648973   | 1p34.3     | 36,518,627  | A         | 0.08                                     | 0.0273    | 4.6E-03  |
| 9  | rs7542867  | 1p22.1     | 93,076,518  | A         | 0.03                                     | 0.0062    | 2.5E-06  |
| 10 | rs71580314 | 1q21.3     | 150,507,691 | A         | 0.04                                     | 0.0060    | 1.6E-09  |
| 11 | rs61816761 | 1q21.3     | 152,285,861 | A         | 0.29                                     | 0.0219    | 3.5E-39  |
| 12 | rs4129267  | 1q21.3     | 154,426,264 | T         | 0.04                                     | 0.0061    | 1.4E-11  |
| 13 | rs3027001  | 1q23.2     | 159,169,463 | C         | 0.04                                     | 0.0071    | 5.5E-08  |
| 14 | rs2070901  | 1q23.3     | 161,185,058 | T         | 0.05                                     | 0.0067    | 3.6E-12  |
| 15 | rs1214598  | 1q24.2     | 167,426,424 | G         | 0.06                                     | 0.0062    | 2.9E-21  |
| 16 | rs10912564 | 1q25.1     | 173,170,618 | T         | 0.05                                     | 0.0065    | 1.5E-14  |
| 17 | rs17669032 | 1q31.3     | 198,653,174 | A         | 0.07                                     | 0.0099    | 8.6E-13  |
| 18 | rs7555556  | 1q32.1     | 203,090,976 | C         | 0.04                                     | 0.0064    | 3.0E-11  |
| 19 | rs4127124  | 1q32.1     | 206,624,362 | A         | 0.04                                     | 0.0060    | 4.6E-09  |
| 20 | rs906364   | 1q32.3     | 212,858,748 | C         | 0.04                                     | 0.0078    | 1.4E-07  |
| 21 | rs697852   | 1q42.12    | 226,914,734 | A         | 0.05                                     | 0.0079    | 1.5E-09  |
| 22 | rs10178845 | 2p25.1     | 8,443,803   | G         | 0.07                                     | 0.0066    | 1.7E-24  |

|    |            |        |             |   |      |        |         |
|----|------------|--------|-------------|---|------|--------|---------|
| 23 | rs72787718 | 2p23.1 | 30,474,351  | A | 0.04 | 0.0071 | 3.2E-08 |
| 24 | rs68110799 | 2p16.1 | 60,945,555  | A | 0.04 | 0.0069 | 8.9E-08 |
| 25 | rs13421997 | 2p14   | 64,946,639  | G | 0.03 | 0.0068 | 8.0E-07 |
| 26 | rs35548551 | 2p13.2 | 72,039,714  | T | 0.05 | 0.0092 | 4.4E-07 |
| 27 | rs3771180  | 2q12.1 | 102,953,617 | G | 0.17 | 0.0086 | 2.1E-92 |
| 28 | rs13405741 | 2q13   | 111,913,056 | C | 0.05 | 0.0102 | 2.4E-07 |
| 29 | rs2723197  | 2q13   | 113,689,747 | G | 0.03 | 0.0061 | 2.4E-06 |
| 30 | rs7425446  | 2q22.2 | 143,777,498 | A | 0.04 | 0.0076 | 2.2E-08 |
| 31 | rs6741949  | 2q24.2 | 162,910,223 | G | 0.03 | 0.0061 | 1.0E-08 |
| 32 | rs2595389  | 2q32.1 | 187,534,183 | T | 0.03 | 0.0060 | 1.0E-05 |
| 33 | rs2164068  | 2q33.1 | 198,943,852 | T | 0.03 | 0.0060 | 5.4E-08 |
| 34 | rs13383994 | 2q36.1 | 224,667,692 | A | 0.03 | 0.0061 | 5.3E-06 |
| 35 | rs7423358  | 2q36.3 | 228,704,721 | C | 0.05 | 0.0070 | 2.2E-12 |
| 36 | rs9247     | 2q37.1 | 234,113,301 | C | 0.03 | 0.0076 | 5.9E-04 |
| 37 | rs34290285 | 2q37.3 | 242,698,640 | G | 0.12 | 0.0068 | 1.7E-70 |
| 38 | rs334782   | 3p26.2 | 3,148,458   | C | 0.03 | 0.0062 | 1.7E-05 |
| 39 | rs13101202 | 3p25.2 | 12,699,361  | C | 0.05 | 0.0080 | 2.1E-09 |
| 40 | rs2014490  | 3p24.3 | 16,972,211  | G | 0.04 | 0.0063 | 9.2E-10 |
| 41 | rs2036226  | 3p24.3 | 23,597,986  | T | 0.03 | 0.0061 | 7.5E-08 |
| 42 | rs35570272 | 3p22.3 | 33,047,662  | T | 0.06 | 0.0062 | 1.5E-21 |
| 43 | rs73072483 | 3p21.2 | 50,771,624  | G | 0.05 | 0.0090 | 1.4E-07 |
| 44 | rs9813229  | 3p14.3 | 56,741,585  | A | 0.03 | 0.0062 | 1.4E-07 |
| 45 | rs7372960  | 3p13   | 71,254,751  | T | 0.04 | 0.0070 | 1.4E-07 |
| 46 | rs61192126 | 3p13   | 72,394,852  | T | 0.04 | 0.0066 | 6.9E-10 |
| 47 | rs55749605 | 3q12.3 | 101,232,093 | A | 0.03 | 0.0062 | 3.2E-05 |

|    |             |         |             |   |      |        |         |
|----|-------------|---------|-------------|---|------|--------|---------|
| 48 | rs7622814   | 3q13.2  | 112,650,431 | T | 0.03 | 0.0060 | 9.8E-09 |
| 49 | rs9877891   | 3q13.33 | 119,260,866 | C | 0.04 | 0.0078 | 2.7E-08 |
| 50 | rs10049074  | 3q13.33 | 121,702,325 | T | 0.03 | 0.0060 | 6.9E-08 |
| 51 | rs2811518   | 3q21.3  | 128,013,645 | A | 0.05 | 0.0092 | 1.1E-08 |
| 52 | rs13077048  | 3q23    | 141,106,954 | T | 0.04 | 0.0061 | 2.5E-10 |
| 53 | rs17485347  | 3q26.2  | 169,127,519 | C | 0.03 | 0.0069 | 2.3E-06 |
| 54 | rs7626218   | 3q26.32 | 176,852,038 | A | 0.05 | 0.0061 | 4.5E-15 |
| 55 | rs13099273  | 3q28    | 188,133,518 | A | 0.06 | 0.0061 | 2.5E-22 |
| 56 | rs7636495   | 3q29    | 196,367,936 | G | 0.06 | 0.0079 | 1.4E-12 |
| 57 | rs9291151   | 4p16.2  | 4,775,137   | T | 0.03 | 0.0061 | 6.0E-07 |
| 58 | rs5743618   | 4p14    | 38,798,648  | C | 0.10 | 0.0073 | 6.8E-43 |
| 59 | rs73242688  | 4q12    | 58,236,911  | C | 0.08 | 0.0209 | 1.1E-04 |
| 60 | rs227361    | 4q24    | 103,586,977 | T | 0.03 | 0.0060 | 8.4E-07 |
| 61 | rs34712979  | 4q24    | 106,819,053 | A | 0.04 | 0.0070 | 3.5E-07 |
| 62 | rs4145717   | 4q27    | 123,316,076 | T | 0.07 | 0.0064 | 3.9E-24 |
| 63 | rs111379736 | 4q31.21 | 143,763,739 | A | 0.02 | 0.0065 | 3.7E-03 |
| 64 | rs6842889   | 4q31.21 | 145,479,880 | T | 0.03 | 0.0062 | 3.0E-06 |
| 65 | rs7734081   | 5p15.32 | 6,126,715   | C | 0.02 | 0.0060 | 1.8E-03 |
| 66 | rs16903574  | 5p15.2  | 14,610,309  | G | 0.10 | 0.0118 | 4.5E-16 |
| 67 | rs12697352  | 5p13.2  | 35,837,234  | G | 0.06 | 0.0064 | 2.2E-18 |
| 68 | rs7725052   | 5p13.1  | 40,487,270  | T | 0.03 | 0.0061 | 1.9E-05 |
| 69 | rs1501641   | 5q12.1  | 59,188,105  | A | 0.02 | 0.0062 | 7.3E-04 |
| 70 | rs10040192  | 5q13.2  | 71,695,880  | C | 0.03 | 0.0061 | 3.2E-08 |
| 71 | rs1837253   | 5q22.1  | 110,401,872 | C | 0.11 | 0.0068 | 2.7E-57 |
| 72 | rs3813308   | 5q23.1  | 118,690,781 | G | 0.04 | 0.0060 | 3.9E-11 |

|    |            |         |             |   |      |        |          |
|----|------------|---------|-------------|---|------|--------|----------|
| 73 | rs11950815 | 5q31.1  | 130,955,487 | G | 0.04 | 0.0063 | 8.6E-12  |
| 74 | rs848      | 5q31.1  | 131,996,500 | A | 0.10 | 0.0076 | 1.1E-39  |
| 75 | rs62379371 | 5q31.1  | 133,439,274 | G | 0.08 | 0.0142 | 6.5E-09  |
| 76 | rs10875596 | 5q31.3  | 141,495,715 | C | 0.05 | 0.0062 | 6.6E-16  |
| 77 | rs11746314 | 5q33.3  | 156,752,957 | G | 0.09 | 0.0130 | 4.2E-11  |
| 78 | rs61665417 | 5q34    | 159,918,335 | C | 0.04 | 0.0067 | 2.1E-11  |
| 79 | rs56297224 | 5q35.3  | 176,815,880 | A | 0.04 | 0.0069 | 2.4E-08  |
| 80 | rs12196306 | 6p25.3  | 249,788     | G | 0.04 | 0.0077 | 1.1E-06  |
| 81 | rs3777755  | 6p24.1  | 12,159,699  | C | 0.03 | 0.0065 | 2.1E-07  |
| 82 | rs13203384 | 6p22.3  | 19,341,301  | A | 0.04 | 0.0074 | 1.8E-06  |
| 83 | rs952579   | 6p22.3  | 21,884,440  | A | 0.05 | 0.0086 | 2.4E-09  |
| 84 | rs766406   | 6p22.2  | 26,319,588  | T | 0.04 | 0.0063 | 7.8E-09  |
| 85 | rs1233578  | 6p22.1  | 28,712,247  | G | 0.05 | 0.0078 | 3.7E-12  |
| 86 | rs9272346  | 6p21.32 | 32,604,372  | A | 0.15 | 0.0061 | 1.4E-127 |
| 87 | rs411919   | 6p21.32 | 33,194,477  | G | 0.04 | 0.0068 | 4.1E-11  |
| 88 | rs9394288  | 6p21.31 | 35,222,010  | T | 0.05 | 0.0076 | 2.3E-09  |
| 89 | rs6902766  | 6p12.3  | 51,370,323  | T | 0.04 | 0.0093 | 1.4E-04  |
| 90 | rs1504215  | 6q15    | 91,006,227  | G | 0.08 | 0.0064 | 1.3E-35  |
| 91 | rs9372120  | 6q21    | 106,667,535 | G | 0.03 | 0.0075 | 5.1E-06  |
| 92 | rs11759732 | 6q21    | 109,370,006 | A | 0.05 | 0.0084 | 1.9E-08  |
| 93 | rs813915   | 6q22.33 | 128,287,313 | T | 0.06 | 0.0070 | 3.6E-17  |
| 94 | rs4526212  | 6q23.3  | 135,804,631 | A | 0.04 | 0.0062 | 6.5E-11  |
| 95 | rs17264332 | 6q23.3  | 138,005,515 | A | 0.05 | 0.0073 | 6.4E-11  |
| 96 | rs13190880 | 6q24.2  | 143,222,770 | T | 0.06 | 0.0104 | 8.5E-08  |
| 97 | rs431362   | 6q25.1  | 149,787,378 | A | 0.04 | 0.0063 | 1.5E-08  |

|     |            |         |             |   |      |        |         |
|-----|------------|---------|-------------|---|------|--------|---------|
| 98  | rs4599658  | 6q25.2  | 155,074,505 | G | 0.03 | 0.0061 | 1.8E-08 |
| 99  | rs895990   | 6q25.3  | 156,434,876 | G | 0.02 | 0.0061 | 1.2E-03 |
| 100 | rs62438869 | 6q27    | 167,400,917 | A | 0.04 | 0.0090 | 3.9E-06 |
| 101 | rs73033536 | 7p22.2  | 3,149,883   | T | 0.07 | 0.0106 | 8.1E-11 |
| 102 | rs10244416 | 7p21.1  | 20,575,751  | C | 0.06 | 0.0060 | 8.4E-21 |
| 103 | rs1800797  | 7p15.3  | 22,766,221  | G | 0.04 | 0.0062 | 1.1E-11 |
| 104 | rs917117   | 7p15.1  | 28,176,305  | A | 0.07 | 0.0074 | 1.9E-22 |
| 105 | rs9886239  | 7p12.2  | 50,336,551  | A | 0.03 | 0.0063 | 5.9E-06 |
| 106 | rs2190097  | 7q11.23 | 77,038,945  | C | 0.04 | 0.0071 | 3.2E-08 |
| 107 | rs10258293 | 7q22.3  | 105,662,690 | C | 0.02 | 0.0081 | 7.9E-03 |
| 108 | rs35113952 | 8p23.3  | 1,789,817   | T | 0.02 | 0.0066 | 8.7E-03 |
| 109 | rs7014953  | 8p23.1  | 8,168,413   | A | 0.03 | 0.0062 | 2.3E-07 |
| 110 | rs4739738  | 8q21.13 | 81,291,645  | G | 0.07 | 0.0062 | 2.2E-32 |
| 111 | rs12548612 | 8q23.3  | 117,349,990 | C | 0.03 | 0.0095 | 4.2E-03 |
| 112 | rs13277355 | 8q24.21 | 128,777,719 | A | 0.05 | 0.0067 | 1.3E-14 |
| 113 | rs34173062 | 8q24.3  | 145,158,607 | A | 0.09 | 0.0125 | 1.3E-12 |
| 114 | rs992969   | 9p24.1  | 6,209,697   | A | 0.13 | 0.0069 | 1.9E-78 |
| 115 | rs10960423 | 9p23    | 11,991,732  | A | 0.09 | 0.0268 | 5.9E-04 |
| 116 | rs274945   | 9p21.3  | 23,585,741  | A | 0.03 | 0.0060 | 1.2E-08 |
| 117 | rs10738765 | 9p21.2  | 27,259,224  | C | 0.03 | 0.0078 | 5.2E-04 |
| 118 | rs1537504  | 9q22.33 | 101,829,542 | A | 0.04 | 0.0071 | 1.5E-07 |
| 119 | rs4978607  | 9q32    | 117,508,437 | C | 0.05 | 0.0092 | 2.3E-08 |
| 120 | rs1930781  | 9q33.2  | 123,687,834 | G | 0.04 | 0.0063 | 7.9E-09 |
| 121 | rs10986311 | 9q33.3  | 127,071,493 | C | 0.03 | 0.0062 | 2.7E-08 |
| 122 | rs11539209 | 9q34.11 | 131,483,551 | T | 0.07 | 0.0110 | 9.7E-11 |

|     |             |          |             |       |      |        |         |
|-----|-------------|----------|-------------|-------|------|--------|---------|
| 123 | rs782134971 | 9q34.2   | 136,139,907 | G     | 0.03 | 0.0069 | 1.5E-05 |
| 124 | rs117137535 | 9q34.3   | 140,500,443 | A     | 0.12 | 0.0205 | 3.9E-09 |
| 125 | rs4749894   | 10p15.1  | 6,058,323   | A     | 0.06 | 0.0071 | 9.1E-16 |
| 126 | rs2197415   | 10p14    | 9,062,856   | G     | 0.10 | 0.0061 | 5.9E-60 |
| 127 | rs9284092   | 10p11.23 | 30,801,718  | G     | 0.03 | 0.0068 | 8.5E-06 |
| 128 | rs12769745  | 10q11.21 | 43,749,700  | A     | 0.03 | 0.0067 | 1.5E-06 |
| 129 | rs2893907   | 10q21.2  | 64,382,359  | C     | 0.03 | 0.0061 | 2.9E-08 |
| 130 | rs1134777   | 10q22.2  | 75,538,651  | C     | 0.04 | 0.0068 | 2.3E-07 |
| 131 | rs113092121 | 10q23.33 | 94,384,514  | TTCTC | 0.04 | 0.0061 | 5.9E-12 |
| 132 | rs12764214  | 10q24.2  | 100,072,209 | C     | 0.01 | 0.0063 | 2.5E-02 |
| 133 | rs11191385  | 10q24.32 | 104,513,049 | G     | 0.03 | 0.0065 | 3.2E-05 |
| 134 | rs12788104  | 11p15.5  | 1,123,739   | G     | 0.05 | 0.0065 | 3.2E-15 |
| 135 | rs11042902  | 11p15.4  | 10,655,623  | T     | 0.04 | 0.0066 | 3.8E-09 |
| 136 | rs7130870   | 11p13    | 36,344,202  | C     | 0.04 | 0.0064 | 9.0E-09 |
| 137 | rs714417    | 11p11.2  | 45,247,176  | C     | 0.04 | 0.0065 | 7.5E-08 |
| 138 | rs174551    | 11q12.2  | 61,573,684  | T     | 0.05 | 0.0064 | 1.0E-13 |
| 139 | rs479844    | 11q13.1  | 65,551,957  | G     | 0.05 | 0.0060 | 1.0E-18 |
| 140 | rs7936323   | 11q13.5  | 76,293,758  | A     | 0.11 | 0.0060 | 5.9E-74 |
| 141 | rs56324483  | 11q21    | 95,424,511  | G     | 0.04 | 0.0090 | 4.6E-05 |
| 142 | rs1784776   | 11q23.1  | 111,472,392 | T     | 0.04 | 0.0066 | 1.5E-10 |
| 143 | rs12365699  | 11q23.3  | 118,743,286 | G     | 0.07 | 0.0081 | 1.7E-17 |
| 144 | rs55836957  | 11q24.3  | 128,168,631 | C     | 0.05 | 0.0073 | 1.1E-11 |
| 145 | rs56389811  | 12q13.11 | 48,205,358  | C     | 0.04 | 0.0071 | 5.8E-09 |
| 146 | rs3759129   | 12q13.12 | 50,354,437  | C     | 0.04 | 0.0076 | 3.0E-06 |
| 147 | rs1689510   | 12q13.2  | 56,396,768  | C     | 0.07 | 0.0064 | 2.8E-27 |

|     |             |          |             |     |      |        |         |
|-----|-------------|----------|-------------|-----|------|--------|---------|
| 148 | rs167769    | 12q13.3  | 57,503,775  | T   | 0.07 | 0.0062 | 8.6E-31 |
| 149 | rs1051334   | 12q21.1  | 71,523,134  | A   | 0.04 | 0.0061 | 3.4E-09 |
| 150 | rs150449584 | 12q21.31 | 85,793,022  | C   | 0.10 | 0.0251 | 1.1E-04 |
| 151 | rs12303699  | 12q22    | 94,582,336  | A   | 0.04 | 0.0062 | 1.9E-09 |
| 152 | rs653178    | 12q24.12 | 112,007,756 | T   | 0.03 | 0.0061 | 9.1E-08 |
| 153 | rs625228    | 12q24.31 | 121,278,266 | A   | 0.04 | 0.0060 | 9.5E-11 |
| 154 | rs7132277   | 12q24.31 | 123,593,382 | C   | 0.04 | 0.0077 | 1.1E-06 |
| 155 | rs7323267   | 13q14.11 | 41,204,015  | C   | 0.03 | 0.0075 | 4.8E-04 |
| 156 | rs61960013  | 13q14.11 | 44,490,181  | G   | 0.04 | 0.0074 | 7.0E-09 |
| 157 | rs981625    | 13q22.1  | 74,039,935  | G   | 0.08 | 0.0124 | 7.5E-10 |
| 158 | rs7987173   | 13q32.3  | 100,073,342 | C   | 0.05 | 0.0061 | 3.5E-16 |
| 159 | rs10162476  | 14q13.1  | 34,144,433  | G   | 0.02 | 0.0061 | 1.2E-04 |
| 160 | rs34332679  | 14q13.2  | 35,881,966  | GA  | 0.04 | 0.0063 | 9.9E-11 |
| 161 | rs34307686  | 14q13.3  | 37,651,998  | CTG | 0.02 | 0.0068 | 2.2E-03 |
| 162 | rs3751289   | 14q23.1  | 61,983,943  | G   | 0.04 | 0.0073 | 9.8E-08 |
| 163 | rs911263    | 14q24.1  | 68,753,593  | C   | 0.05 | 0.0067 | 9.2E-16 |
| 164 | rs888414    | 14q24.3  | 75,104,905  | A   | 0.02 | 0.0062 | 9.7E-05 |
| 165 | rs10131197  | 14q32.12 | 93,015,394  | G   | 0.04 | 0.0064 | 2.6E-10 |
| 166 | rs59457020  | 14q32.31 | 103,190,843 | G   | 0.05 | 0.0092 | 4.5E-09 |
| 167 | rs1942      | 15q15.1  | 41,774,423  | G   | 0.04 | 0.0060 | 3.7E-11 |
| 168 | rs11071559  | 15q22.2  | 61,069,988  | C   | 0.09 | 0.0087 | 2.4E-27 |
| 169 | rs17293632  | 15q22.33 | 67,442,596  | T   | 0.11 | 0.0071 | 5.7E-57 |
| 170 | rs11259930  | 15q25.2  | 84,577,350  | A   | 0.03 | 0.0061 | 8.5E-09 |
| 171 | rs8029440   | 15q26.1  | 91,409,514  | G   | 0.03 | 0.0063 | 8.8E-07 |
| 172 | rs11645975  | 16p13.3  | 3,749,397   | G   | 0.03 | 0.0069 | 3.5E-05 |



|     |             |          |            |    |      |        |         |
|-----|-------------|----------|------------|----|------|--------|---------|
| 173 | rs12935657  | 16p13.13 | 11,219,041 | G  | 0.09 | 0.0070 | 3.8E-41 |
| 174 | rs3024655   | 16p12.1  | 27,369,502 | G  | 0.12 | 0.0122 | 1.4E-21 |
| 175 | rs2066844   | 16q12.1  | 50,745,926 | T  | 0.09 | 0.0145 | 3.2E-09 |
| 176 | rs223819    | 16q13    | 57,394,862 | T  | 0.05 | 0.0112 | 2.3E-06 |
| 177 | rs71368508  | 17p13.2  | 4,521,473  | C  | 0.13 | 0.0213 | 6.8E-10 |
| 178 | rs72842819  | 17p13.1  | 7,328,821  | C  | 0.06 | 0.0094 | 3.2E-09 |
| 179 | rs750065349 | 17p12    | 12,193,443 | GC | 0.04 | 0.0060 | 8.6E-10 |
| 180 | rs2305479   | 17q12    | 38,062,217 | C  | 0.11 | 0.0060 | 2.9E-69 |
| 181 | rs2006141   | 17q21.2  | 40,679,718 | T  | 0.04 | 0.0067 | 8.2E-08 |
| 182 | rs7224548   | 17q21.31 | 43,337,136 | G  | 0.05 | 0.0066 | 1.1E-13 |
| 183 | rs72833417  | 17q21.32 | 45,873,049 | T  | 0.06 | 0.0093 | 3.3E-12 |
| 184 | rs17637472  | 17q21.33 | 47,461,433 | A  | 0.06 | 0.0063 | 7.7E-20 |
| 185 | rs1991401   | 17q23.3  | 62,502,435 | A  | 0.04 | 0.0065 | 1.1E-08 |
| 186 | rs111365807 | 17q25.1  | 73,825,463 | C  | 0.05 | 0.0093 | 1.2E-07 |
| 187 | rs76848919  | 17q25.3  | 76,352,554 | C  | 0.04 | 0.0075 | 5.6E-09 |
| 188 | rs12956924  | 18q21.1  | 46,451,146 | A  | 0.04 | 0.0065 | 3.7E-08 |
| 189 | rs12453988  | 18q21.2  | 48,581,918 | T  | 0.03 | 0.0062 | 1.7E-07 |
| 190 | rs3730775   | 18q21.2  | 51,813,966 | T  | 0.04 | 0.0061 | 3.3E-10 |
| 191 | rs3826620   | 18q21.33 | 60,021,504 | G  | 0.04 | 0.0066 | 1.3E-09 |
| 192 | rs12964116  | 18q21.33 | 61,442,619 | G  | 0.10 | 0.0160 | 2.6E-09 |
| 193 | rs10853952  | 19p13.3  | 1,163,934  | T  | 0.03 | 0.0065 | 1.4E-06 |
| 194 | rs117552144 | 19p13.3  | 3,136,091  | T  | 0.09 | 0.0130 | 3.6E-11 |
| 195 | rs10420217  | 19p13.3  | 4,355,871  | C  | 0.04 | 0.0067 | 2.0E-08 |
| 196 | rs755023315 | 19p13.3  | 6,579,029  | G  | 0.04 | 0.0068 | 2.7E-09 |
| 197 | rs10416530  | 19p13.2  | 9,129,660  | C  | 0.04 | 0.0064 | 6.0E-11 |

|     |             |          |            |   |      |        |         |
|-----|-------------|----------|------------|---|------|--------|---------|
| 198 | rs34006614  | 19p13.11 | 16,442,782 | T | 0.03 | 0.0064 | 1.1E-07 |
| 199 | rs118013485 | 19q13.11 | 33,726,577 | G | 0.14 | 0.0123 | 3.3E-29 |
| 200 | rs143432496 | 19q13.32 | 45,252,714 | A | 0.05 | 0.0068 | 2.3E-11 |
| 201 | rs8103278   | 19q13.32 | 46,370,381 | G | 0.04 | 0.0063 | 1.2E-08 |
| 202 | rs11670020  | 19q13.41 | 52,314,161 | G | 0.04 | 0.0086 | 1.7E-06 |
| 203 | rs8125525   | 20q13.12 | 45,681,788 | C | 0.04 | 0.0069 | 1.7E-07 |
| 204 | rs6021270   | 20q13.2  | 50,141,264 | T | 0.07 | 0.0125 | 1.0E-08 |
| 205 | rs2766667   | 20q13.2  | 52,172,404 | T | 0.05 | 0.0069 | 1.9E-11 |
| 206 | rs6011033   | 20q13.33 | 62,322,699 | G | 0.05 | 0.0071 | 9.7E-13 |
| 207 | rs1736147   | 21q21.1  | 16,813,053 | G | 0.03 | 0.0061 | 1.1E-07 |
| 208 | rs2242900   | 21q22.12 | 36,453,837 | G | 0.07 | 0.0087 | 1.1E-15 |
| 209 | rs34846236  | 21q22.2  | 41,049,344 | G | 0.03 | 0.0061 | 5.3E-06 |
| 210 | rs12626388  | 21q22.3  | 43,856,593 | T | 0.04 | 0.0085 | 2.4E-06 |
| 211 | rs228953    | 22q12.3  | 37,531,436 | G | 0.03 | 0.0061 | 8.1E-06 |
| 212 | rs201267172 | 22q13.2  | 41,918,653 | G | 0.05 | 0.0076 | 1.3E-12 |

Abbreviations: SNPs, Single-nucleotide Polymorphisms; CHR, Chromosome; EA, Effect Allele; SE, Standard Error.

**e-Table 2. Baseline characteristics per health lifestyle category and genetic risk group of adult-onset asthma.**

|                                           | Low genetic risk   |                        |                    | Intermediate genetic risk |                        |                    | Poor genetic risk  |                        |                    |
|-------------------------------------------|--------------------|------------------------|--------------------|---------------------------|------------------------|--------------------|--------------------|------------------------|--------------------|
|                                           | Ideal lifestyle    | Intermediate lifestyle | Poor lifestyle     | Ideal lifestyle           | Intermediate lifestyle | Poor lifestyle     | Ideal lifestyle    | Intermediate lifestyle | Poor lifestyle     |
|                                           | Mean±SD or No. (%) | Mean±SD or No. (%)     | Mean±SD or No. (%) | Mean±SD or No. (%)        | Mean±SD or No. (%)     | Mean±SD or No. (%) | Mean±SD or No. (%) | Mean±SD or No. (%)     | Mean±SD or No. (%) |
| Age (year)                                | 56.30±8.09         | 56.68±8.01             | 54.77±7.90         | 56.32±8.15                | 56.74±8.02             | 54.55±7.75         | 56.46±8.08         | 56.81±7.97             | 54.99±7.64         |
| Age category (years)                      |                    |                        |                    |                           |                        |                    |                    |                        |                    |
| <50                                       | 7748(24.3)         | 17096(22.6)            | 488(30.0)          | 7883(24.7)                | 16851(22.4)            | 513(29.5)          | 7527(23.7)         | 16500(21.9)            | 478(26.3)          |
| 50-59                                     | 10575(33.2)        | 25197(33.3)            | 599(36.9)          | 10377(32.5)               | 25032(33.2)            | 673(38.7)          | 10540(33.2)        | 25405(33.7)            | 740(40.7)          |
| >60                                       | 13527(42.5)        | 33263(44.0)            | 538(33.1)          | 13692(42.9)               | 33457(44.4)            | 552(31.8)          | 13717(43.2)        | 33556(44.5)            | 600(33.0)          |
| Sex                                       |                    |                        |                    |                           |                        |                    |                    |                        |                    |
| Female                                    | 21049(66.1)        | 34983(46.3)            | 634(39.0)          | 20949(65.6)               | 34975(46.4)            | 673(38.7)          | 20901(65.8)        | 34939(46.3)            | 701(38.6)          |
| Male                                      | 10801(33.9)        | 40573(53.7)            | 991(61.0)          | 11003(34.4)               | 40365(53.6)            | 1065(61.3)         | 10883(34.2)        | 40522(53.7)            | 1117(61.4)         |
| Alcohol status                            |                    |                        |                    |                           |                        |                    |                    |                        |                    |
| Never                                     | 1279(4.0)          | 1826(2.4)              | 52(3.2)            | 1217(3.8)                 | 1924(2.6)              | 53(3.0)            | 1234(3.9)          | 1905(2.5)              | 53(2.9)            |
| Previous                                  | 852(2.7)           | 2467(3.3)              | 88(5.4)            | 888(2.8)                  | 2505(3.3)              | 116(6.7)           | 908(2.9)           | 2493(3.3)              | 122(6.7)           |
| Current                                   | 29710(93.3)        | 71216(94.3)            | 1483(91.3)         | 29835(93.4)               | 70869(94.1)            | 1569(90.3)         | 29628(93.2)        | 71030(94.1)            | 1642(90.3)         |
| Unkown                                    | 9(0.0)             | 47(0.1)                | 2(0.1)             | 12(0.0)                   | 42(0.1)                | 0(0.0)             | 14(0.0)            | 33(0.0)                | 1(0.1)             |
| Average Total Household Income Before Tax |                    |                        |                    |                           |                        |                    |                    |                        |                    |
| Less than 18,000                          | 4874(15.3)         | 14315(18.9)            | 478(29.4)          | 4827(15.1)                | 14446(19.2)            | 506(29.1)          | 4968(15.6)         | 14415(19.1)            | 546(30.0)          |
| 18,000 to 30,999                          | 6798(21.3)         | 17043(22.6)            | 347(21.4)          | 6997(21.9)                | 16864(22.4)            | 347(20.0)          | 6988(22.0)         | 17223(22.8)            | 369(20.3)          |
| 31,000 to 51,999                          | 7519(23.6)         | 18155(24.0)            | 356(21.9)          | 7586(23.7)                | 18229(24.2)            | 380(21.9)          | 7555(23.8)         | 17942(23.8)            | 384(21.1)          |
| 52,000 to 100,000                         | 6816(21.4)         | 14301(18.9)            | 223(13.7)          | 6679(20.9)                | 14232(18.9)            | 265(15.2)          | 6441(20.3)         | 14126(18.7)            | 240(13.2)          |
| Greater than 100,000                      | 2129(6.7)          | 3700(4.9)              | 34(2.1)            | 2044(6.4)                 | 3566(4.7)              | 45(2.6)            | 2073(6.5)          | 3672(4.9)              | 53(2.9)            |

|                                  |             |             |            |             |             |            |             |             |            |
|----------------------------------|-------------|-------------|------------|-------------|-------------|------------|-------------|-------------|------------|
| Unknow                           | 3714(11.7)  | 8042(10.6)  | 187(11.5)  | 3819(12.0)  | 8003(10.6)  | 195(11.2)  | 3759(11.8)  | 8083(10.7)  | 226(12.4)  |
| Education                        |             |             |            |             |             |            |             |             |            |
| College or University Degree     | 13641(42.8) | 23940(31.7) | 309(19.0)  | 13659(42.7) | 23742(31.5) | 296(17.0)  | 13405(42.2) | 23287(30.9) | 327(18.0)  |
| Professional Qualifications      | 3128(9.8)   | 9267(12.3)  | 202(12.4)  | 3043(9.5)   | 9462(12.6)  | 224(12.9)  | 3083(9.7)   | 9293(12.3)  | 235(12.9)  |
| A Levels/AS Levels or Equivalent | 3897(12.2)  | 8792(11.6)  | 145(8.9)   | 3973(12.4)  | 8699(11.5)  | 181(10.4)  | 3955(12.4)  | 8713(11.5)  | 187(10.3)  |
| O Levels/GCSEs or Equivalent     | 7775(24.4)  | 20821(27.6) | 532(32.7)  | 7688(24.1)  | 20603(27.3) | 566(32.6)  | 7754(24.4)  | 21266(28.2) | 594(32.7)  |
| None of the above                | 3409(10.7)  | 12736(16.9) | 437(26.9)  | 3589(11.2)  | 12834(17.0) | 471(27.1)  | 3587(11.3)  | 12902(17.1) | 475(26.1)  |
| BMI (kg/m <sup>2</sup> )         | 24.42±3.67  | 28.25±4.37  | 32.13±5.23 | 24.44±3.64  | 28.26±4.42  | 32.21±5.32 | 24.42±3.68  | 28.21±4.38  | 32.52±5.55 |

Abbreviations: SD, Standard Deviation; BMI, Body Mass Index.

**e-Table 3. Risk of incident adult-onset asthma associated with genetic risk and health lifestyle by sex.**

|                           | Female                           |                            |                  |          | Male                             |                            |                  |          |
|---------------------------|----------------------------------|----------------------------|------------------|----------|----------------------------------|----------------------------|------------------|----------|
|                           | No. of asthma cases/person-years | IR (Per 1000 Person-years) | HR (95% CI)      | <i>P</i> | No. of asthma cases/person-years | IR (Per 1000 Person-years) | HR (95% CI)      | <i>P</i> |
| Low Genetic Risk          |                                  |                            |                  |          |                                  |                            |                  |          |
| Ideal Lifestyle           | 235/249475                       | 0.94                       | Ref.             |          | 86/128141                        | 0.67                       | Ref.             |          |
| Intermediate Lifestyle    | 672/412356                       | 1.63                       | 1.69 (1.46-1.96) | <.001    | 568/480045                       | 1.18                       | 1.72 (1.37-2.15) | <.001    |
| Poor Lifestyle            | 21/7468                          | 2.81                       | 2.90 (1.85-4.53) | <.001    | 35/11696                         | 2.99                       | 4.23 (2.85-6.27) | <.001    |
| Intermediate Genetic Risk |                                  |                            |                  |          |                                  |                            |                  |          |
| Ideal Lifestyle           | 331/247571                       | 1.34                       | 1.41 (1.19-1.67) | <.001    | 130/130149                       | 1.00                       | 1.48 (1.13-1.94) | 0.005    |
| Intermediate Lifestyle    | 804/411372                       | 1.95                       | 2.02 (1.75-2.34) | <.001    | 710/476640                       | 1.49                       | 2.16 (1.72-2.70) | <.001    |
| Poor Lifestyle            | 21/7947                          | 2.64                       | 2.72 (1.74-4.25) | <.001    | 25/12641                         | 1.98                       | 2.83 (1.81-4.42) | <.001    |
| High Genetic Risk         |                                  |                            |                  |          |                                  |                            |                  |          |
| Ideal Lifestyle           | 434/246039                       | 1.76                       | 1.86 (1.59-2.18) | <.001    | 180/128282                       | 1.40                       | 2.08 (1.61-2.68) | <.001    |
| Intermediate Lifestyle    | 974/409836                       | 2.38                       | 2.45 (2.12-2.83) | <.001    | 943/476651                       | 1.98                       | 2.86 (2.29-3.57) | <.001    |
| Poor Lifestyle            | 31/8209                          | 3.78                       | 3.80 (2.61-5.53) | <.001    | 38/13164                         | 2.89                       | 4.11 (2.80-6.02) | <.001    |

Adjusted by age, education, Townsend Index, alcohol status, region, relatedness, number of alleles included in the polygenic risk score, and first 20 principal components of ancestry.

Abbreviations: IR, Incidence Rate; HR, Hazard Ratio; CI, Confidence Interval.

**e-Table 4. Risk of incident adult-onset asthma associated with genetic risk and health lifestyle in different age categories.**

| Lifestyle                 | <50 years old                    |                  |          | 50-59 years old                  |                  |          | >60 years old                    |                  |          |
|---------------------------|----------------------------------|------------------|----------|----------------------------------|------------------|----------|----------------------------------|------------------|----------|
|                           | No. of asthma cases/person-years | HR (95% CI)      | <i>P</i> | No. of asthma cases/person-years | HR (95% CI)      | <i>P</i> | No. of asthma cases/person-years | HR (95% CI)      | <i>P</i> |
| Low Genetic Risk          |                                  |                  |          |                                  |                  |          |                                  |                  |          |
| Ideal Lifestyle           | 63/92499                         | Ref.             |          | 88/125648                        | Ref.             |          | 170/159469                       | Ref.             |          |
| Intermediate Lifestyle    | 206/203158                       | 1.54 (1.16-2.04) | 0.003    | 370/298904                       | 1.80 (1.43-2.27) | <.001    | 664/390339                       | 1.64 (1.39-1.95) | <.001    |
| Poor Lifestyle            | 11/5817                          | 2.76 (1.45-5.24) | 0.002    | 17/7129                          | 3.30 (1.96-5.56) | <.001    | 28/6218                          | 4.23 (2.83-6.32) | <.001    |
| Intermediate Genetic Risk |                                  |                  |          |                                  |                  |          |                                  |                  |          |
| Ideal Lifestyle           | 94/93644                         | 1.47 (1.07-2.02) | 0.018    | 130/123074                       | 1.49 (1.14-1.96) | 0.004    | 237/161002                       | 1.38 (1.13-1.68) | 0.001    |
| Intermediate Lifestyle    | 270/199680                       | 2.04 (1.55-2.69) | <.001    | 461/296239                       | 2.26 (1.80-2.84) | <.001    | 783/392093                       | 1.93 (1.63-2.28) | <.001    |
| Poor Lifestyle            | 12/6093                          | 2.95 (1.59-5.49) | 0.001    | 17/7997                          | 2.94 (1.75-4.96) | <.001    | 17/6498                          | 2.48 (1.51-4.09) | <.001    |
| High Genetic Risk         |                                  |                  |          |                                  |                  |          |                                  |                  |          |
| Ideal Lifestyle           | 137/89119                        | 2.24 (1.66-3.02) | <.001    | 189/124605                       | 2.16 (1.67-2.78) | <.001    | 288/160597                       | 1.68 (1.39-2.02) | <.001    |
| Intermediate Lifestyle    | 380/194990                       | 2.95 (2.26-3.86) | <.001    | 588/299938                       | 2.84 (2.27-3.56) | <.001    | 949/391559                       | 2.33 (1.98-2.75) | <.001    |
| Poor Lifestyle            | 16/5652                          | 4.20 (2.42-7.28) | <.001    | 32/8701                          | 5.03 (3.35-7.56) | <.001    | 21/7020                          | 2.82 (1.79-4.45) | <.001    |

Adjusted by sex, education, Townsend Index, alcohol status, region, relatedness, number of alleles included in the polygenic risk score, and first 20 principal components of ancestry.

Abbreviations: HR, Hazard Ratio; CI, Confidence Interval.

**e-Table 5. Total participants and incident adult-onset asthma cases in each genetic and health lifestyle category.**

| <b>Lifestyle Factor</b>  | <b>Genetic Risk</b> | <b>Lifestyle Factor category</b> | <b>Total No. of participants</b> | <b>No. of asthma events (%)</b> | <b>Person-years at risk</b> | <b>Incidence rate (Per 1000 person-years)</b> |
|--------------------------|---------------------|----------------------------------|----------------------------------|---------------------------------|-----------------------------|-----------------------------------------------|
| <b>BMI</b>               | Low                 | Ideal                            | 37291                            | 360(1.00)                       | 442055                      | 0.81                                          |
|                          |                     | Intermediate                     | 47142                            | 664(1.40)                       | 557826                      | 1.19                                          |
|                          |                     | Poor                             | 24598                            | 593(2.40)                       | 289300                      | 2.05                                          |
|                          | Intermediate        | Ideal                            | 37375                            | 535(1.40)                       | 441981                      | 1.21                                          |
|                          |                     | Intermediate                     | 46906                            | 814(1.70)                       | 553708                      | 1.47                                          |
|                          |                     | Poor                             | 24749                            | 672(2.70)                       | 290631                      | 2.31                                          |
|                          | High                | Ideal                            | 37622                            | 721(1.90)                       | 443166                      | 1.63                                          |
|                          |                     | Intermediate                     | 47091                            | 1096(2.30)                      | 554161                      | 1.98                                          |
|                          |                     | Poor                             | 24350                            | 783(3.20)                       | 284854                      | 2.75                                          |
| <b>Smoking</b>           | Low                 | Ideal                            | 58902                            | 742(1.30)                       | 697653                      | 1.06                                          |
|                          |                     | Intermediate                     | 38968                            | 675(1.70)                       | 459275                      | 1.47                                          |
|                          |                     | Poor                             | 11161                            | 200(1.80)                       | 132253                      | 1.51                                          |
|                          | Intermediate        | Ideal                            | 58998                            | 975(1.70)                       | 697082                      | 1.40                                          |
|                          |                     | Intermediate                     | 38741                            | 791(2.00)                       | 455728                      | 1.74                                          |
|                          |                     | Poor                             | 11291                            | 255(2.30)                       | 133510                      | 1.91                                          |
|                          | High                | Ideal                            | 58957                            | 1316(2.20)                      | 693900                      | 1.90                                          |
|                          |                     | Intermediate                     | 39032                            | 971(2.50)                       | 457979                      | 2.12                                          |
|                          |                     | Poor                             | 11074                            | 313(2.80)                       | 130302                      | 2.40                                          |
| <b>Physical activity</b> | Low                 | Ideal                            | 88074                            | 1212(1.40)                      | 1041268                     | 1.16                                          |
|                          |                     | Intermediate                     | 6421                             | 101(1.60)                       | 75965                       | 1.33                                          |
|                          |                     | Poor                             | 14536                            | 304(2.10)                       | 171948                      | 1.77                                          |
|                          | Intermediate        | Ideal                            | 88145                            | 1581(1.80)                      | 1039400                     | 1.52                                          |



|                         |              |              |       |            |         |      |
|-------------------------|--------------|--------------|-------|------------|---------|------|
|                         |              | Intermediate | 6318  | 118(1.90)  | 74519   | 1.58 |
|                         |              | Poor         | 14567 | 322(2.20)  | 172401  | 1.87 |
|                         | High         | Ideal        | 87588 | 2004(2.30) | 1029224 | 1.95 |
|                         |              | Intermediate | 6575  | 154(2.30)  | 77430   | 1.99 |
|                         |              | Poor         | 14900 | 442(3.00)  | 175527  | 2.52 |
| <b>Diet</b>             | Low          | Ideal        | 29939 | 415(1.40)  | 354424  | 1.17 |
|                         |              | Intermediate | 70306 | 1049(1.50) | 830885  | 1.26 |
|                         |              | Poor         | 8786  | 153(1.70)  | 103872  | 1.47 |
|                         | Intermediate | Ideal        | 29572 | 535(1.81)  | 348993  | 1.53 |
|                         |              | Intermediate | 70340 | 1313(1.87) | 829301  | 1.58 |
|                         |              | Poor         | 9118  | 173(1.90)  | 108026  | 1.60 |
|                         | High         | Ideal        | 29618 | 662(2.24)  | 348567  | 1.90 |
|                         |              | Intermediate | 70250 | 1709(2.43) | 825216  | 2.07 |
|                         |              | Poor         | 9195  | 229(2.49)  | 108398  | 2.11 |
| <b>Health lifestyle</b> | Low          | Ideal        | 31850 | 321(1.01)  | 377616  | 0.85 |
|                         |              | Intermediate | 75556 | 1240(1.64) | 892401  | 1.39 |
|                         |              | Poor         | 1625  | 56(3.45)   | 19164   | 2.92 |
|                         | Intermediate | Ideal        | 31952 | 461(1.44)  | 377720  | 1.22 |
|                         |              | Intermediate | 75340 | 1514(2.01) | 888012  | 1.70 |
|                         |              | Poor         | 1738  | 46(2.65)   | 20588   | 2.23 |
|                         | High         | Ideal        | 31784 | 614(1.93)  | 374321  | 1.64 |
|                         |              | Intermediate | 75461 | 1917(2.54) | 886487  | 2.16 |
|                         |              | Poor         | 1818  | 69(3.80)   | 21373   | 3.23 |

Abbreviations: BMI, Body Mass Index.

**e-Table 6. Risk of incident adult-onset asthma according to lifestyle factor based on different genetic risk group.**

|                   |              | Low Genetic Risk                |          | Intermediate Genetic Risk        |          | High Genetic Risk                |          |
|-------------------|--------------|---------------------------------|----------|----------------------------------|----------|----------------------------------|----------|
|                   |              | HR (95% CI)                     | <i>P</i> | HR (95% CI)                      | <i>P</i> | HR (95% CI)                      | <i>P</i> |
| BMI               | Ideal        | Ref.                            |          | Ref.                             |          | Ref.                             |          |
|                   | Intermediate | 1.50 (1.31-1.70)                | <.001    | 1.24 (1.11-1.39)                 | <.001    | 1.24 (1.13-1.37)                 | <.001    |
|                   | Poor         | 2.49 (2.18-2.85)                | <.001    | 1.90 (1.70-2.13)                 | <.001    | 1.68 (1.52-1.86)                 | <.001    |
|                   |              | <i>P</i> <sub>trend</sub> <.001 |          | <i>P</i> <sub>trend</sub> <.001  |          | <i>P</i> <sub>trend</sub> <.001  |          |
| Smoking           | Ideal        | Ref.                            |          | Ref.                             |          | Ref.                             |          |
|                   | Intermediate | 1.31 (1.18-1.46)                | <.001    | 1.20 (1.09-1.32)                 | <.001    | 1.09 (1.00-1.19)                 | 0.039    |
|                   | Poor         | 1.40 (1.19-1.64)                | <.001    | 1.36 (1.18-1.57)                 | <.001    | 1.24 (1.10-1.41)                 | 0.001    |
|                   |              | <i>P</i> <sub>trend</sub> <.001 |          | <i>P</i> <sub>trend</sub> <.001  |          | <i>P</i> <sub>trend</sub> =0.002 |          |
| Physical Activity | Ideal        | Ref.                            |          | Ref.                             |          | Ref.                             |          |
|                   | Intermediate | 1.19 (0.97-1.45)                | 0.099    | 1.08 (0.89-1.30)                 | 0.440    | 1.04 (0.88-1.23)                 | 0.616    |
|                   | Poor         | 1.50 (1.32-1.70)                | <.001    | 1.21 (1.08-1.37)                 | 0.002    | 1.27 (1.15-1.41)                 | <.001    |
|                   |              | <i>P</i> <sub>trend</sub> <.001 |          | <i>P</i> <sub>trend</sub> =0.006 |          | <i>P</i> <sub>trend</sub> <.001  |          |
| Diet              | Ideal        | Ref.                            |          |                                  |          |                                  |          |
|                   | Intermediate | 1.16 (1.03-1.301)               | 0.012    | 1.10 (1.00-1.22)                 | 0.055    | 1.14 (1.04-1.25)                 | 0.005    |
|                   | Poor         | 1.44 (1.19-1.74)                | <.001    | 1.18 (0.99-1.40)                 | 0.068    | 1.19 (1.02-1.39)                 | 0.023    |
|                   |              | <i>P</i> <sub>trend</sub> <.001 |          | <i>P</i> <sub>trend</sub> =0.086 |          | <i>P</i> <sub>trend</sub> =0.010 |          |
| Lifestyle         | Ideal        | Ref.                            |          | Ref.                             |          | Ref.                             |          |
|                   | Intermediate | 1.68 (1.48-1.90)                | <.001    | 1.44 (1.30-1.60)                 | <.001    | 1.34 (1.23-1.47)                 | <.001    |
|                   | Poor         | 3.59 (2.69-4.79)                | <.001    | 1.93 (1.42-2.62)                 | <.001    | 1.98 (1.54-2.55)                 | <.001    |
|                   |              | <i>P</i> <sub>trend</sub> <.001 |          | <i>P</i> <sub>trend</sub> <.001  |          | <i>P</i> <sub>trend</sub> <.001  |          |

Adjusted by sex, age, education, Townsend Index, alcohol status and region.

Abbreviations: HR, Hazard Ratio; CI, Confidence Interval; BMI, Body Mass Index.

**e-Table 7. Risk of incident adult-onset asthma according to genetic risk based on different health lifestyle.**

|              | Health Lifestyle          |          |                           |          |                            |          |
|--------------|---------------------------|----------|---------------------------|----------|----------------------------|----------|
|              | Ideal                     |          | Intermediate              |          | Poor                       |          |
| Genetic Risk | HR (95% CI)               | <i>P</i> | HR (95% CI)               | <i>P</i> | HR (95% CI)                | <i>P</i> |
| Low          | Ref.                      |          | Ref.                      |          | Ref.                       |          |
| Intermediate | 1.43 (1.24-1.65)          | <.001    | 1.22 (1.14-1.32)          | <.001    | 0.77 (0.52-1.13)           | 0.180    |
| High         | 1.92 (1.68-2.20)          | <.001    | 1.55 (1.44-1.66)          | <.001    | 1.08 (0.76-1.54)           | 0.657    |
|              | $P_{\text{trend}} < .001$ |          | $P_{\text{trend}} < .001$ |          | $P_{\text{trend}} = 0.178$ |          |

Adjusted by sex, age, education, Townsend Index, alcohol status, region, relatedness, number of alleles included in the polygenic risk score, and first 20 principal components of ancestry.

Abbreviations: HR: Hazard Ratio; CI, Confidence Interval.

**e-Table 8. Population-attributable fraction per group.**

|              | <b>Groups</b>                    | <b>PAF (%) (95% CI)</b> | <b><i>P</i></b> |
|--------------|----------------------------------|-------------------------|-----------------|
| Lifestyle    | Non-ideal to ideal lifestyle     | 30.2 (25.9-34.2)        | <.001           |
|              | Intermediate to ideal lifestyle  | 29.2 (24.9-33.3)        | <.001           |
|              | Poor to ideal lifestyle          | 55.7 (48.3-62.1)        | <.001           |
| Genetic Risk | Non-low to low genetic risk      | 30.0 (26.0-33.8)        | <.001           |
|              | Intermediate to low genetic risk | 20.0 (14.6-25.0)        | <.001           |
|              | High to low genetic risk         | 37.8 (33.8-41.5)        | <.001           |

Abbreviations: PAF, Population Attributable Fraction; CI, Confidence Interval.

**e-Table 9. Population-attributable fraction of different kinds of lifestyle in different genetic risk level.**

| Lifestyle         | Lifestyle Groups      | Low Genetic Risk |          | Intermediate Genetic Risk |          | High Genetic Risk |          |
|-------------------|-----------------------|------------------|----------|---------------------------|----------|-------------------|----------|
|                   |                       | PAF (%) (95% CI) | <i>P</i> | PAF (%) (95% CI)          | <i>P</i> | PAF (%) (95% CI)  | <i>P</i> |
| BMI               | Non-ideal to ideal    | 44.9 (38.1~51.0) | <.001    | 31.0 (23.9~37.4)          | <.001    | 27.1 (20.7~33.1)  | <.001    |
|                   | Intermediate to ideal | 31.5 (22.1~39.7) | <.001    | 17.5 (8.1~26.0)           | <.001    | 17.7 (9.6~25.0)   | <.001    |
|                   | Poor to ideal         | 59.9 (54.4~64.8) | <.001    | 47.3 (41.0~52.9)          | <.001    | 40.4 (34.1~46.1)  | <.001    |
| Smoking           | Non-ideal to ideal    | 27.8 (20.5~34.5) | <.001    | 20.9 (13.8~27.5)          | <.001    | 12.9 (6.0~19.3)   | <.001    |
|                   | Intermediate to ideal | 27.3 (19.3~34.4) | <.001    | 19.1 (11.2~26.2)          | <.001    | 10.3 (2.6~17.3)   | 0.009    |
|                   | Poor to ideal         | 29.7 (17.9~39.8) | <.001    | 26.8 (16.1~36.1)          | <.001    | 21.0 (10.8~30.1)  | <.001    |
| Physical Activity | Non-ideal to ideal    | 28.8 (20.4~36.3) | <.001    | 14.9 (5.5~23.3)           | 0.003    | 17.6 (9.8~24.7)   | <.001    |
|                   | Intermediate to ideal | 12.5 (-7.0~28.5) | 0.193    | 4.0 (-15.6~20.2)          | 0.669    | 2.3 (-14.9~16.9)  | 0.777    |
|                   | Poor to ideal         | 34.2 (25.5~41.9) | <.001    | 18.9 (8.6~27.9)           | <.001    | 22.9 (14.6~30.3)  | <.001    |
| Diet              | Non-ideal to ideal    | 8.8 (-1.9~18.3)  | 0.103    | 3.3 (-6.7~12.3)           | 0.507    | 8.4 (0.0~16.0)    | 0.049    |
|                   | Intermediate to ideal | 7.1 (-4.0~17.0)  | 0.201    | 3.1 (-7.1~12.3)           | 0.538    | 8.1 (-0.4~15.9)   | 0.061    |
|                   | Poor to ideal         | 20.4 (4.3~33.8)  | 0.015    | 4.6 (-13.0~19.5)          | 0.583    | 10.2 (-4.1~22.6)  | 0.153    |
| Lifestyle         | Non-ideal to ideal    | 40.0 (32.2~46.8) | <.001    | 28.7 (21.0~35.7)          | <.001    | 24.8 (17.8~31.3)  | <.001    |
|                   | Intermediate to ideal | 38.6 (30.6~45.6) | <.001    | 28.2 (20.4~35.2)          | <.001    | 24.0 (16.8~30.5)  | <.001    |
|                   | Poor to ideal         | 70.7 (61.3~77.9) | <.001    | 45.5 (26.5~59.6)          | <.001    | 49.1 (35.0~60.1)  | <.001    |

Abbreviations: PAF, Population Attributable Fraction; CI, Confidence Interval; BMI, Body Mass Index.

**e-Table 10. Sensitivity Analysis.**

|                                  | Mismatched genetic and reported sex <sup>a</sup> |                                  |                            |                  |          | Non-critical missing factors <sup>b</sup> |                                  |                            |                  |          |
|----------------------------------|--------------------------------------------------|----------------------------------|----------------------------|------------------|----------|-------------------------------------------|----------------------------------|----------------------------|------------------|----------|
|                                  | Total No. of participants (n=327,345)            | No. of asthma cases/person-years | IR (per 1000 person-years) | HR (95% CI)      | <i>P</i> | Total No. of participants (n=327,124)     | No. of asthma cases/person-years | IR (per 1000 person-years) | HR (95% CI)      | <i>P</i> |
| <b>Low Genetic Risk</b>          |                                                  |                                  |                            |                  |          |                                           |                                  |                            |                  |          |
| Ideal Lifestyle                  | 31869                                            | 322/377831                       | 0.85                       | Ref.             |          | 31850                                     | 321/377616                       | 0.85                       | Ref.             |          |
| Intermediate Lifestyle           | 75608                                            | 1242/893012                      | 1.39                       | 1.67 (1.48-1.89) | <.001    | 75556                                     | 1240/892401                      | 1.39                       | 1.66 (1.46-1.87) | <.001    |
| Poor Lifestyle                   | 1628                                             | 57/19193                         | 2.97                       | 3.58 (2.70-4.74) | <.001    | 1625                                      | 56/19164                         | 2.92                       | 3.46 (2.60-4.60) | <.001    |
| <b>Intermediate Genetic Risk</b> |                                                  |                                  |                            |                  |          |                                           |                                  |                            |                  |          |
| Ideal Lifestyle                  | 31964                                            | 461/377857                       | 1.22                       | 1.43 (1.24-1.64) | <.001    | 31952                                     | 461/377720                       | 1.22                       | 1.43 (1.24-1.65) | <.001    |
| Intermediate Lifestyle           | 75400                                            | 1516/888710                      | 1.71                       | 2.05 (1.81-2.31) | <.001    | 75340                                     | 1514/888012                      | 1.70                       | 2.03 (1.80-2.29) | <.001    |
| Poor Lifestyle                   | 1740                                             | 47/20610                         | 2.28                       | 2.77 (2.03-3.76) | <.001    | 1738                                      | 46/20588                         | 2.23                       | 2.66 (1.95-3.62) | <.001    |
| <b>High Genetic Risk</b>         |                                                  |                                  |                            |                  |          |                                           |                                  |                            |                  |          |
| Ideal Lifestyle                  | 31803                                            | 614/374549                       | 1.64                       | 1.91 (1.67-2.19) | <.001    | 31784                                     | 614/374321                       | 1.64                       | 1.92 (1.67-2.19) | <.001    |
| Intermediate Lifestyle           | 75513                                            | 1919/887090                      | 2.16                       | 2.59 (2.30-2.91) | <.001    | 75461                                     | 1917/886487                      | 2.16                       | 2.57 (2.28-2.89) | <.001    |
| Poor Lifestyle                   | 1820                                             | 69/21399                         | 3.22                       | 3.85 (2.97-5.00) | <.001    | 1818                                      | 69/21373                         | 3.23                       | 3.79 (2.91-4.92) | <.001    |

<sup>a</sup> Included participants with mismatched genetic and reported sex.

<sup>b</sup> Participants with non-critical missing factors after multiple imputation.

Adjusted by age, sex, education, Townsend Index, alcohol status, region, relatedness, number of alleles included in the polygenic risk score, and first 20 principal components of ancestry.

Abbreviations: HR, Hazard Ratio; CI, Confidence Interval; IR, Incidence Rate.

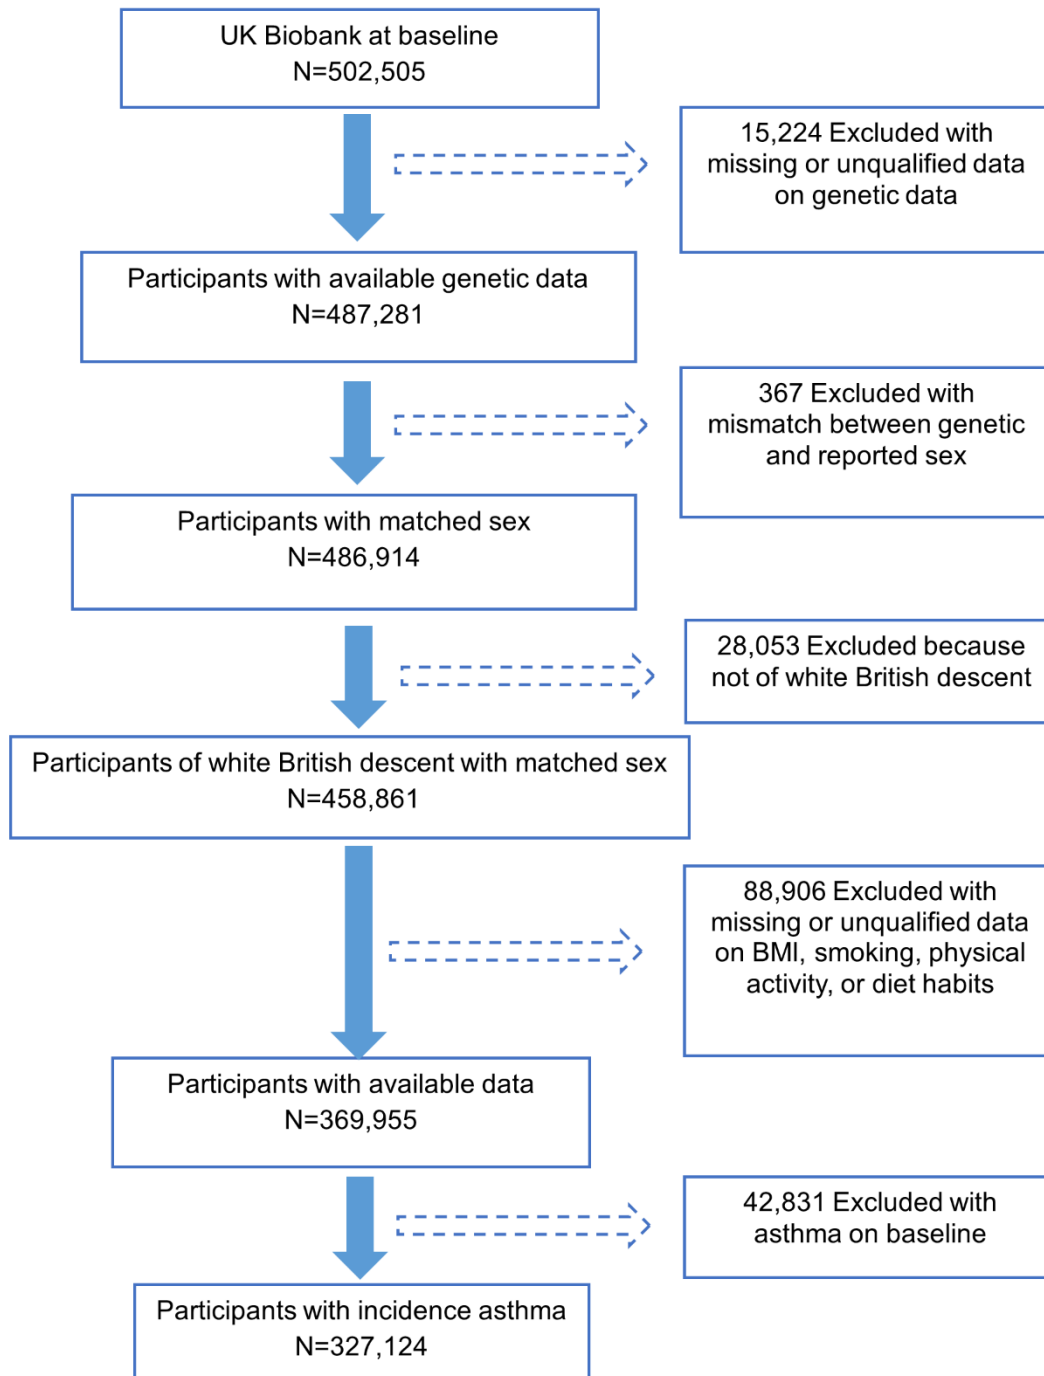

**e-Figure 1. Flow diagram of eligible population from the UK Biobank Study.**

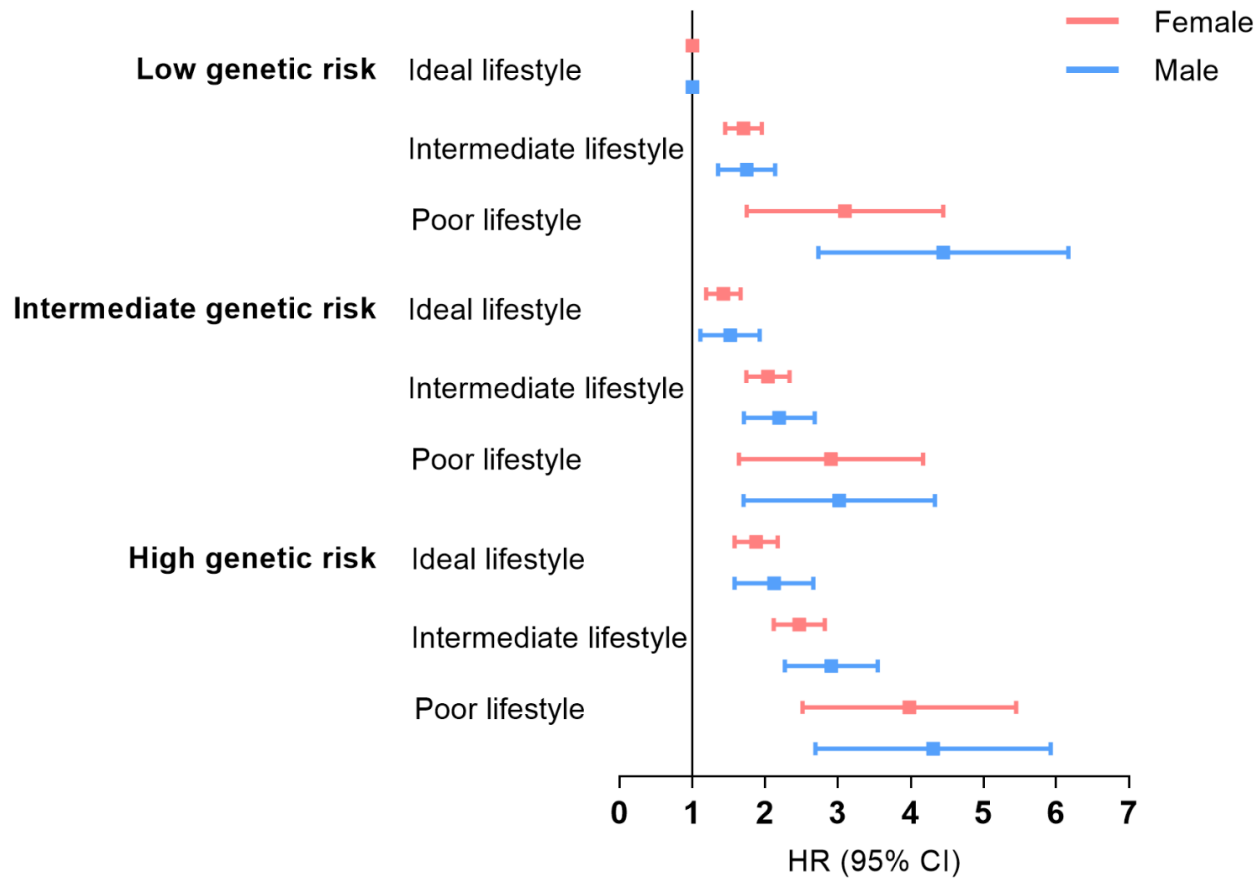

**e-Figure 2. Risk of Incident asthma associated with Genetic Risk and Health Lifestyle Categorized by Sex.** Adjusted by age, education, Townsend Index, alcohol status, region, relatedness, number of alleles included in the polygenic risk score, and first 20 principal components of ancestry. Abbreviations: HR, Hazard Ratio; CI, Confidence Interval.



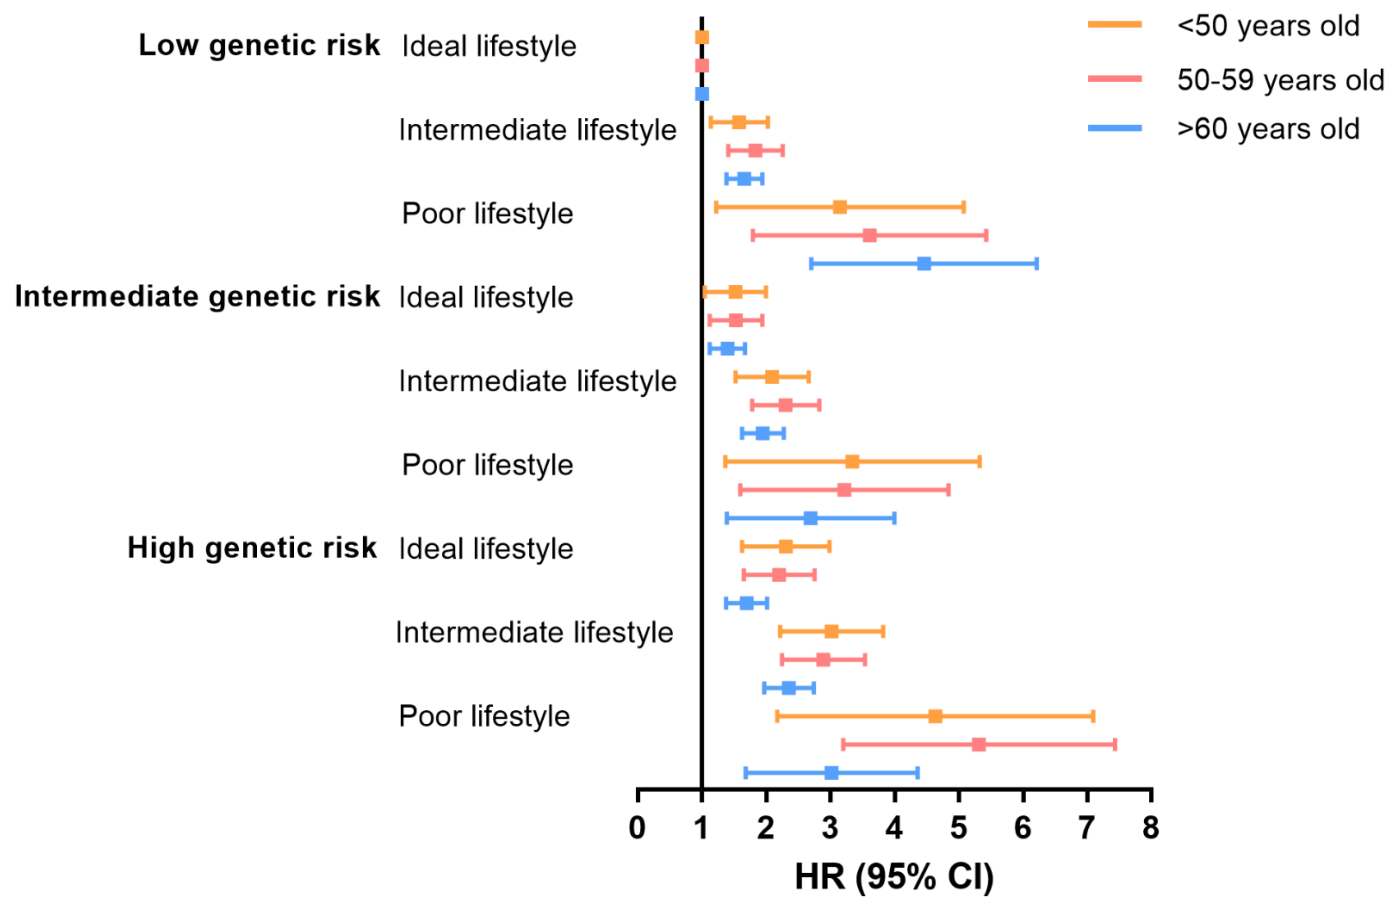

**e-Figure 3. Risk of Incident asthma associated with Genetic Risk and Health Lifestyle Categorized by Age.** Adjusted by sex, education, Townsend Index, alcohol status, region, relatedness, number of alleles included in the polygenic risk score, and first 20 principal components of ancestry. Abbreviations: HR, Hazard Ratio; CI, Confidence Interval.
